# Supplementary material for: Abnormal Morphology and Synaptogenic Signaling in Astrocytes Following Prenatal Opioid Exposure
Source: MDPI journal article supplement (doi:10.3390/cells13100837), 2024-05-14
Supplement: s1 [file s1]

Figure S1

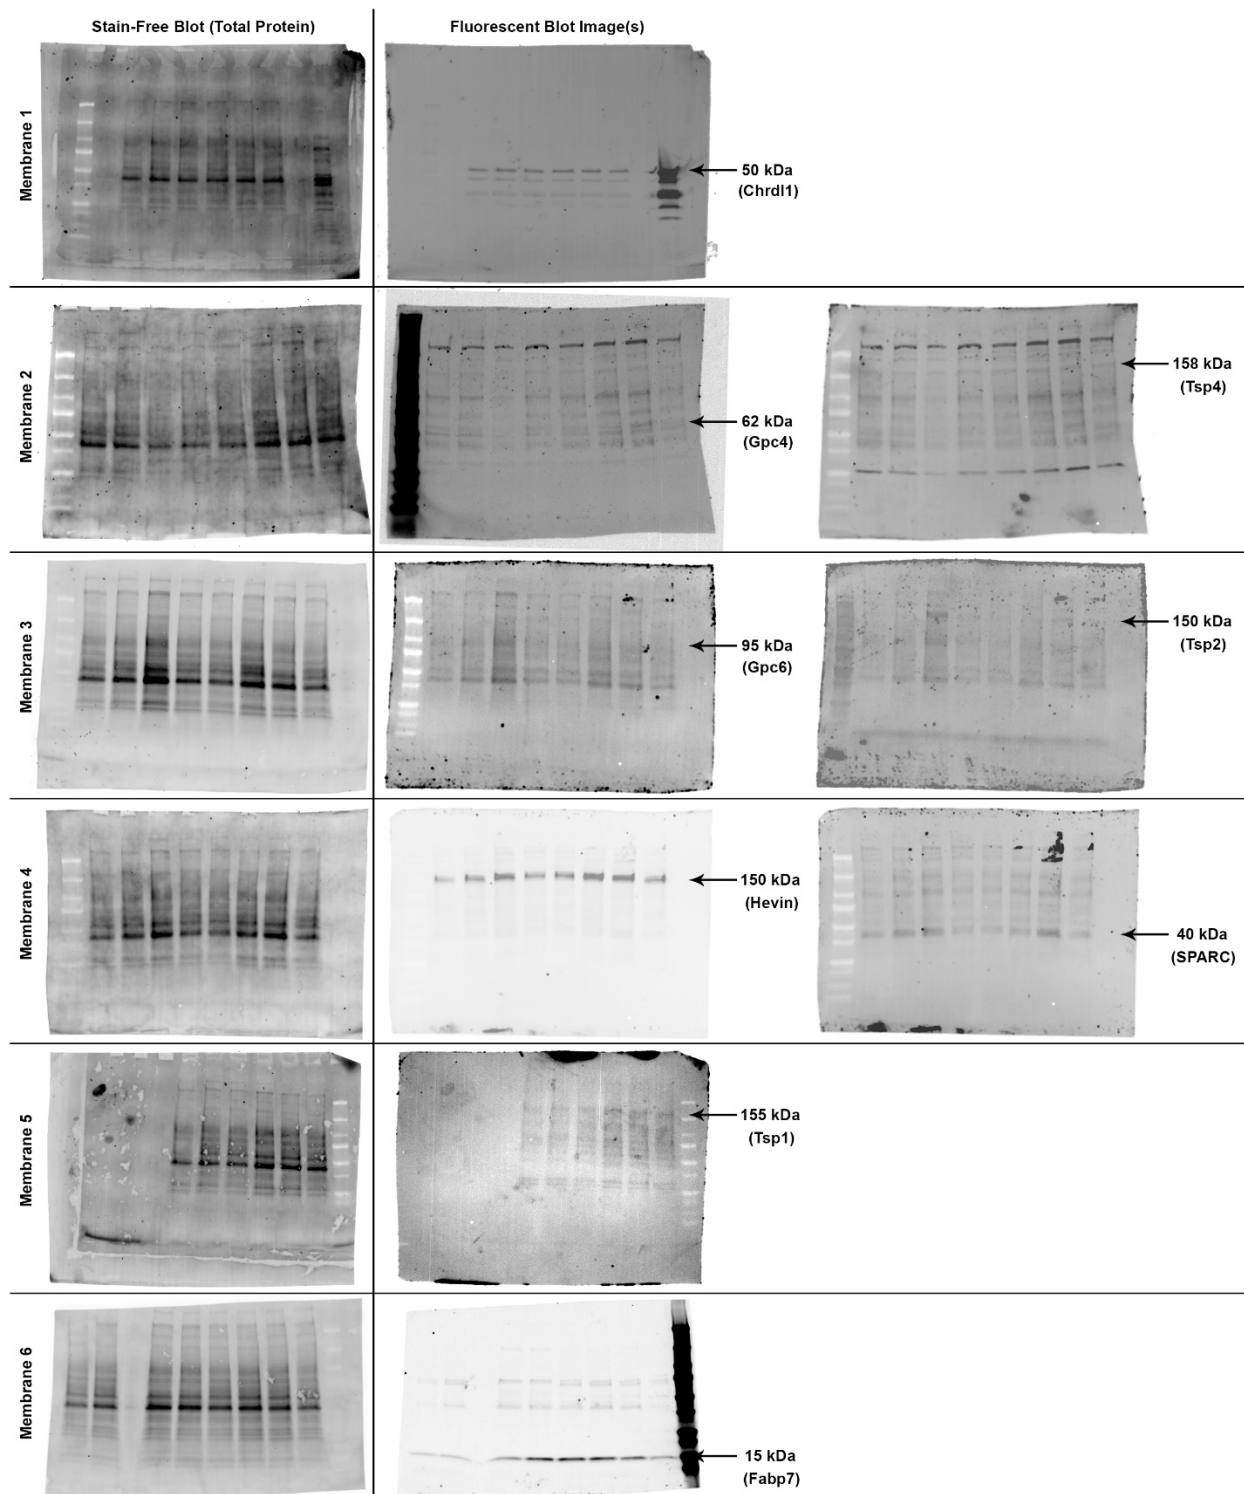

Uncropped Western blot membranes showing total protein content used for normalization along with the associated fluorescent blot images for the various primary antibodies probed.
